# Supplementary material for: Preparation and characterization of fish skin gelatin and chitosan-based active dressings for skin wound healing
Source: Royal Society of Chemistry journal article supplement (doi:10.1039/d5ra05902j), 2026-01-01
Supplement: d5ra05902j3.pdf [file d5ra05902j3.pdf]

Supplementary Tables

Supplementary Table S1 Details of animal groups and experimental design

| Group                             | Treatment Type                                                                                                           | Number of Mice (n) | Sex Distribution | Time Points for Sacrifice | Total Animals per Group |
|-----------------------------------|--------------------------------------------------------------------------------------------------------------------------|--------------------|------------------|---------------------------|-------------------------|
| Control Group (CG)                | No dressing, natural healing                                                                                             | 5 per time point   | 2♂/3♀ per group  | Day 3, Day 8              | 10                      |
| Non-thermosensitive Dressing (TA) | TA dressing (commercial non-thermosensitive adhesive)                                                                    | 5 per time point   | 2♂/3♀ per group  | Day 3, Day 8              | 10                      |
| AWD Group                         | AWD dressing (temperature-responsive, AgNP-loaded) PNIPAm-free hydrogel (same composition as FSG-CS-AgNP AWD, no PNIPAm) | 5 per time point   | 2♂/3♀ per group  | Day 3, Day 8              | 10                      |
| PNIPAm-free Control (PF)          | FSG-CS-AgNP composition as AWD, no PNIPAm)                                                                               | 5 per time point   | 2♂/3♀ per group  | Day 3, Day 8              | 10                      |

Supplementary Table S2 Histopathological scoring criteria for wound healing

| Evaluation Indicator  | Score Grade | Specific Criteria                                                     |
|-----------------------|-------------|-----------------------------------------------------------------------|
| Inflammation Severity | 0           | Normal tissue with no inflammatory cell infiltration                  |
|                       | 1           | Minimal inflammation, with ≤5 inflammatory cells per high-power field |
|                       | 2           | Mild inflammation, with 6–15 inflammatory cells per high-power field  |

|                              |   |                                                                           |
|------------------------------|---|---------------------------------------------------------------------------|
|                              | 3 | Moderate inflammation, with 16–30 inflammatory cells per high-power field |
|                              | 4 | Severe inflammation, with >30 inflammatory cells per high-power field     |
| Granulation Tissue Formation | 0 | No granulation tissue present                                             |
|                              | 1 | Thin and discontinuous granulation tissue                                 |
|                              | 2 | Moderately thick and continuous granulation tissue                        |
|                              | 3 | Thick and well-organized granulation tissue                               |
|                              | 4 | Excessive and disorganized granulation tissue                             |
| Epithelialization Process    | 0 | No epithelialization                                                      |
|                              | 1 | Epithelial tissue covers $\leq 25\%$ of the wound area                    |
|                              | 2 | Epithelial tissue covers 26–50% of the wound area                         |
|                              | 3 | Epithelial tissue covers 51–75% of the wound area                         |
|                              | 4 | Epithelial tissue covers $\geq 76\%$ of the wound area                    |

Supplementary Table S3 Material Parameters for Finite Element Simulation

| Material/<br>Component | Constitutive<br>Model       | Parameter<br>Name                                | Value (mean<br>$\pm$ SD) | Unit                          | Notes                                            |
|------------------------|-----------------------------|--------------------------------------------------|--------------------------|-------------------------------|--------------------------------------------------|
| AWD                    | Modified Flory-Rehner Model | Polymer-solvent interaction parameter ( $\chi$ ) | $0.52 \pm 0.03$          | -                             | Thermoresponsive network free energy calculation |
| AWD                    | Modified Flory-Rehner Model | Degree of polymerization (N)                     | $1000 \pm 50$            | -                             | Crosslinking density-related parameter           |
| AWD                    | Modified Flory-             | Density ( $\rho$ )                               | $1.05 \pm 0.02$          | $\text{g}\cdot\text{cm}^{-3}$ | Hydrogel bulk                                    |

|                          |                          |                                  |                 |     |                                     |
|--------------------------|--------------------------|----------------------------------|-----------------|-----|-------------------------------------|
|                          | Rehner Model             |                                  |                 |     | density                             |
| AWD                      | Hyperelastic Model       | Elastic Modulus (E)              | $1.2 \pm 0.1$   | MPa | Derived from tensile test           |
| AWD                      | Hyperelastic Model       | Poisson's Ratio ( $\nu$ )        | $0.5 \pm 0.01$  | -   | Incompressible hydrogel assumption  |
| AWD                      | Hyperelastic Model       | Shear Modulus (G)                | $0.48 \pm 0.04$ | MPa | Calculated via $G = E/(2(1+\nu))$   |
| Mouse Skin               | Ogden Hyperelastic Model | Ogden Coefficient ( $\alpha_1$ ) | $10 \pm 1.2$    | Pa  | Captures skin initial toe modulus   |
| Mouse Skin               | Ogden Hyperelastic Model | Ogden Coefficient ( $\alpha_2$ ) | $110 \pm 8.5$   | Pa  | Captures skin hardening effect      |
| Mouse Skin               | Ogden Hyperelastic Model | Shear Modulus ( $\mu$ )          | $0.45 \pm 0.03$ | -   | Skin viscoelasticity simplification |
| AWD Thermoresponsiveness | UHYPER Subroutine        | Active Temperature Range         | 280–310         | K   | Corresponding to 37°C trigger       |

Supplementary Table S4 Pore structure parameters of AWD and OAWD determined by FE-SEM

| Group | Pore size range ( $\mu\text{m}$ ) | Average pore size ( $\mu\text{m}$ , mean $\pm$ SD) | Pore density (pores $\cdot$ 100 $\mu\text{m}^{-2}$ , mean $\pm$ SD) | Coefficient of variation (CV) |
|-------|-----------------------------------|----------------------------------------------------|---------------------------------------------------------------------|-------------------------------|
| AWD   | 50–80                             | $65 \pm 8$                                         | $28 \pm 3$                                                          | 0.18                          |
| OAWD  | 70–100                            | $85 \pm 12$                                        | $19 \pm 2$                                                          | 0.25                          |

Note: SD: Standard Deviation; CV: Coefficient of Variation, used to assess the uniformity of pore distribution (lower CV values indicate more uniform pore distribution)

WVTR was determined according to the ASTM E96-16 standard using the cup method. 10 g of anhydrous calcium chloride (desiccant) was added to a weighing cup (inner diameter: 30 mm, height: 20 mm). AWD samples were cut into circles with a diameter of 35 mm and sealed on the cup mouth to ensure no gap (avoiding water vapor leakage). The total mass of the sealed weighing cup was accurately weighed ( $W_1$ ), and then placed in a constant temperature and humidity incubator (temperature: 37°C, relative humidity: 50%). After 24 h, the weighing cup was removed and accurately weighed again ( $W_2$ ). Three parallel samples were set for each experimental group, and WVTR was calculated as follows:

$$\text{WVTR} = (W_2 - W_1) \times 24 / (A \times t)$$

where A is the effective breathable area of the sample ( $\text{cm}^2$ ) and t is the test time (h). CHD was used as a control.

Supplementary Table S5 Comparison of water vapor transmission rates among different wound repair materials

| Experimental group | WVTR mean $\pm$ SD ( $\text{g}/(\text{m}^2 \cdot 24\text{h})$ ) |
|--------------------|-----------------------------------------------------------------|
| AWD                | $2652.38 \pm 58.45$                                             |
| OAWD               | $2985.62 \pm 65.32$                                             |
| PF                 | $3421.75 \pm 72.18$                                             |
| CHD                | $1856.24 \pm 42.56$                                             |

Supplementary Table S6  $\text{Ag}^+$  Release Kinetics

| Detection Method | Indicator                          | Time Point | Value (mean $\pm$ SD) | Unit                                                   | Notes                                    |
|------------------|------------------------------------|------------|-----------------------|--------------------------------------------------------|------------------------------------------|
| ICP-MS           | Cumulative $\text{Ag}^+$ Release   | 7 d        | $15.67 \pm 1.23$      | $\mu\text{g} \cdot \text{cm}^{-2}$                     | Total $\text{Ag}^+$ released over 7 days |
| ICP-MS           | Average $\text{Ag}^+$ Release Rate | 7 d        | $\sim 0.95$           | $\mu\text{g} \cdot \text{cm}^{-2} \cdot \text{d}^{-1}$ | Calculated as cumulative release/7 d     |
| ICP-MS           | Total Ag Content                   | -          | $25.34 \pm 2.11$      | $\mu\text{g}$                                          | Total silver                             |

|                   |         |                         |
|-------------------|---------|-------------------------|
| (Digested<br>AWD) | per AWD | loaded in single<br>AWD |
|-------------------|---------|-------------------------|

Supplementary Table S7 Effect of AWD extract on the survival rate of NIH/3T3 and HaCaT cells

| Group (AWD extract<br>concentration)     | NIH/3T3 cell viability<br>(%) (mean $\pm$ standard<br>deviation) | HaCaT cell survival<br>rate (%) (mean $\pm$<br>standard deviation) | Note                  |
|------------------------------------------|------------------------------------------------------------------|--------------------------------------------------------------------|-----------------------|
| Blank control group (only<br>DMEM+CCK-8) | -                                                                | -                                                                  | Correct<br>background |
| Normal control group (no<br>extract)     | 100.00 $\pm$ 0.02                                                | 100.00 $\pm$ 0.02                                                  | Reference<br>standard |
| 10% (v/v)                                | 98.52 $\pm$ 2.07                                                 | 98.21 $\pm$ 1.85                                                   | $p>0.05$              |
| 25% (v/v)                                | 97.83 $\pm$ 2.25                                                 | 97.32 $\pm$ 2.14                                                   | $p>0.05$              |
| 50% (v/v)                                | 96.54 $\pm$ 2.51                                                 | 96.12 $\pm$ 2.33                                                   | $p>0.05$              |
| 100% (v/v)                               | 88.53 $\pm$ 4.21                                                 | 86.31 $\pm$ 3.82                                                   | $p>0.05$              |

Supplementary Table S8 Simulated vs. Experimental Wound Contraction Ratio and Tissue Ag<sup>+</sup>  
Concentration

| Category                      | Indicator                          | Group | Time<br>Point | Value<br>(mean $\pm$<br>SD) | Unit | Statistical<br>Significance | Notes                                |
|-------------------------------|------------------------------------|-------|---------------|-----------------------------|------|-----------------------------|--------------------------------------|
| Wound<br>Contraction<br>Ratio | Simulated<br>Contracti<br>on Ratio | AWD   | Day 1         | 35.21 $\pm$ 2.89            | %    | -                           | Based on<br>Ogden-<br>Flory<br>model |
| Wound<br>Contraction<br>Ratio | Simulated<br>Contracti<br>on Ratio | AWD   | Day 3         | 52.34 $\pm$ 3.12            | %    | -                           | -                                    |
| Wound<br>Contraction<br>Ratio | Simulated<br>Contracti<br>on Ratio | AWD   | Day 5         | 65.78 $\pm$ 3.56            | %    | -                           | -                                    |

|                                    |                                  |     |       |              |                    |                   |                                   |
|------------------------------------|----------------------------------|-----|-------|--------------|--------------------|-------------------|-----------------------------------|
| Contraction Ratio Wound            | Contracti on Ratio Simulated     |     |       |              |                    |                   |                                   |
| Contraction Ratio                  | Contracti on Ratio               | AWD | Day 8 | 75.28 ± 2.11 | %                  | -                 | -                                 |
| Wound                              | Experime ntal Contracti on Ratio |     |       |              |                    |                   | Measured via ImageJ (mouse model) |
| Contraction Ratio                  | Contracti on Ratio               | AWD | Day 1 | 30.12 ± 2.56 | %                  | -                 |                                   |
| Wound                              | Experime ntal Contracti on Ratio |     |       |              |                    |                   |                                   |
| Contraction Ratio                  | Contracti on Ratio               | AWD | Day 3 | 40.34 ± 3.89 | %                  | -                 | -                                 |
| Wound                              | Experime ntal Contracti on Ratio |     |       |              |                    |                   |                                   |
| Contraction Ratio                  | Contracti on Ratio               | AWD | Day 5 | 58.97 ± 4.12 | %                  | -                 | -                                 |
| Wound                              | Experime ntal Contracti on Ratio |     |       |              |                    |                   |                                   |
| Contraction Ratio                  | Contracti on Ratio               | AWD | Day 8 | 68.67 ± 4.56 | %                  | -                 | -                                 |
| Wound                              | Relative Error                   |     |       |              |                    |                   | (Simulate d -                     |
| Contraction Ratio                  | Relative Error                   | AWD | Day 8 | 6.61 ± 0.89  | %                  | Contraction Ratio | Experime ntal)/Expe rimental      |
| Tissue Ag <sup>+</sup> Concentrati | Wound Skin Ag <sup>+</sup>       | AWD | Day 8 | 0.89 ± 0.12  | µg·g <sup>-1</sup> | p>0.05 vs. CG     | Detected by ICP-                  |

|                        |                       |          |       |             |                    |               |                    |
|------------------------|-----------------------|----------|-------|-------------|--------------------|---------------|--------------------|
| on                     | Content               |          |       |             |                    |               | MS                 |
| Tissue Ag <sup>+</sup> | Liver Ag <sup>+</sup> |          |       |             |                    |               | No                 |
| Concentrati            | Content               | AWD      | Day 8 | 0.34 ± 0.05 | μg·g <sup>-1</sup> | p>0.05 vs. CG | systemic           |
| on                     |                       |          |       |             |                    |               | accumulat          |
|                        |                       |          |       |             |                    |               | ion                |
| Tissue Ag <sup>+</sup> | Kidney                |          |       |             |                    |               | No renal           |
| Concentrati            | Ag <sup>+</sup>       | AWD      | Day 8 | 0.28 ± 0.04 | μg·g <sup>-1</sup> | p>0.05 vs. CG | accumulat          |
| on                     | Content               |          |       |             |                    |               | ion                |
| Tissue Ag <sup>+</sup> | Wound                 | CG       |       |             |                    |               | Backgrou           |
| Concentrati            | Skin Ag <sup>+</sup>  | (Blank   | Day 8 | 0.05 ± 0.01 | μg·g <sup>-1</sup> | -             | nd Ag <sup>+</sup> |
| on                     | Content               | Control) |       |             |                    |               | level              |
| Tissue Ag <sup>+</sup> | Liver Ag <sup>+</sup> | CG       |       |             |                    |               | Backgrou           |
| Concentrati            | Content               | (Blank   | Day 8 | 0.03 ± 0.01 | μg·g <sup>-1</sup> | -             | nd Ag <sup>+</sup> |
| on                     |                       | Control) |       |             |                    |               | level              |
| Tissue Ag <sup>+</sup> | Kidney                | CG       |       |             |                    |               | Backgrou           |
| Concentrati            | Ag <sup>+</sup>       | (Blank   | Day 8 | 0.04 ± 0.01 | μg·g <sup>-1</sup> | -             | nd Ag <sup>+</sup> |
| on                     | Content               | Control) |       |             |                    |               | level              |

Supplementary Table S9 Corresponding to Figure 5 (Comparison of Thermosensitive Response Indicators of Various Dressings)

| Indicator Type | Group | Value<br>(mean±SD)         | Group Type | Notes (Thermosensitive<br>Characteristic) |
|----------------|-------|----------------------------|------------|-------------------------------------------|
| 3h Volume      |       |                            |            | Negative value indicates                  |
| Shrinkage Rate | 5%AWD | -11.67 ± 1.89 <sup>a</sup> | Existing   | swelling (5% AAm                          |
| (%)            |       |                            |            | content)                                  |
| 3h Volume      |       |                            |            | 1% AAm content (mild                      |
| Shrinkage Rate | 1%AWD | 8.34 ± 1.23 <sup>b</sup>   | Existing   | shrinkage)                                |
| (%)            |       |                            |            |                                           |
| 3h Volume      | SA    | 2.12 ± 0.67 <sup>a</sup>   | Existing   | No thermosensitivity                      |
| Shrinkage Rate |       |                            |            | (single-network FSG)                      |

|                 |                  |                      |          |                            |
|-----------------|------------------|----------------------|----------|----------------------------|
| (%)             |                  |                      |          |                            |
| 3h Volume       |                  |                      |          | Weak thermosensitivity     |
| Shrinkage Rate  | SN               | $1.89 \pm 0.54^a$    | Existing | (single-network            |
| (%)             |                  |                      |          | PNIPAm)                    |
| 3h Volume       |                  |                      |          | AWD without AgNPs          |
| Shrinkage Rate  | OAWD             | $15.34 \pm 2.11^c$   | Existing | (gelled at 4°C)            |
| (%)             |                  |                      |          |                            |
| 3h Volume       |                  |                      |          | AWD with AgNPs             |
| Shrinkage Rate  | AWD              | $22.17 \pm 2.34^d$   | Existing | (gelled at 4°C)            |
| (%)             |                  |                      |          |                            |
| 3h Volume       |                  |                      |          | No thermosensitivity       |
| Shrinkage Rate  | PF (PNIPAm-free) | $3.56 \pm 0.89^a$    | Added    | (without PNIPAm)           |
| (%)             |                  |                      |          |                            |
| Area Stretching |                  |                      |          | Positive value indicates   |
| Strength (%)    | 5%AWD            | $155.11 \pm 10.23^c$ | Existing | expansion (5% AAm          |
|                 |                  |                      |          | content)                   |
| Area Stretching |                  |                      |          | 1% AAm content (mild       |
| Strength (%)    | 1%AWD            | $11.55 \pm 1.56^b$   | Existing | stretching)                |
|                 |                  |                      |          | Negative value indicates   |
| Area Stretching |                  |                      |          | shrinkage (physical        |
| Strength (%)    | SA               | $-82.89 \pm 5.45^c$  | Existing | deformation only)          |
|                 |                  |                      |          | Negative value indicates   |
| Area Stretching |                  |                      |          | shrinkage (weak            |
| Strength (%)    | SN               | $-87.31 \pm 6.12^c$  | Existing | thermosensitivity)         |
|                 |                  |                      |          | Negative value indicates   |
| Area Stretching |                  |                      |          | shrinkage                  |
| Strength (%)    | OAWD             | $-61.42 \pm 4.89^d$  | Existing | (thermosensitivity-driven) |
|                 |                  |                      |          | Negative value indicates   |
| Area Stretching |                  |                      |          | shrinkage                  |
| Strength (%)    | AWD              | $-54.82 \pm 5.11^c$  | Existing | (thermosensitivity-driven) |
|                 |                  |                      |          | Negative value indicates   |
| Area Stretching |                  |                      |          | shrinkage (physical        |
| Strength (%)    | PF (PNIPAm-free) | $-4.23 \pm 0.98^a$   | Added    | deformation only)          |

Note: All data are presented as mean  $\pm$  SD with sample size  $n=3-5$ ; statistical analysis was performed using one-way ANOVA followed by Tukey's post-hoc test. Different letters indicate significant differences between groups ( $p<0.05$ ). "Existing Groups" refer to groups already labeled in the original figures; "Added Groups" refer to control groups missing from the original figures and required for supplementation. Commercial materials are labeled with specific brands for clarity.

Supplementary Table S10 Corresponding to Figure 6 (Comparison of In Vitro Wound Contraction Rates of Various Dressings)

| In Vitro Wound               |                                  |            |                                                             |
|------------------------------|----------------------------------|------------|-------------------------------------------------------------|
| Group                        | Contraction Rate (%,<br>mean±SD) | Group Type | Notes (Treatment Method)                                    |
| CG (Blank Control)           | 2.01±0.56 <sup>a</sup>           | Existing   | No dressing, natural healing                                |
| TA                           | 8.07±1.23 <sup>b</sup>           | Existing   | Covered with non-thermosensitive adhesive dressing          |
| AWD                          | 50.12±4.89 <sup>c</sup>          | Existing   | Covered with AWD (with AgNPs, incubated at 37°C for 2 days) |
| PF (PNIPAm-free)             | 15.34±2.11 <sup>c</sup>          | Added      | Covered with control hydrogel (without PNIPAm)              |
| Commercial Hydrogel Dressing | 22.56±3.45 <sup>d</sup>          | Added      | Covered with Tegaderm (3M), clinical control                |

Note: All data are presented as mean  $\pm$  SD with sample size  $n=3-5$ ; statistical analysis was performed using one-way ANOVA followed by Tukey's post-hoc test. Different letters indicate significant differences between groups ( $p<0.05$ ). "Existing Groups" refer to groups already labeled in the original figures; "Added Groups" refer to control groups missing from the original figures and required for supplementation. Commercial materials are labeled with specific brands for clarity.

Supplementary Table S11 Corresponding to Figure 7 (Comparison of In Vivo Wound Healing Indicators of Various Dressings)

| Indicator Type | Time Point | Group | Value (mean $\pm$ SD) | Group Type | Notes (Detection Method) |
|----------------|------------|-------|-----------------------|------------|--------------------------|
|----------------|------------|-------|-----------------------|------------|--------------------------|

|                                    |       |                              |                    |          |                                       |
|------------------------------------|-------|------------------------------|--------------------|----------|---------------------------------------|
| In Vivo Wound Contraction Rate (%) | Day 3 | CG (Blank Control)           | $8.97 \pm 1.89^a$  | Existing | Wound area measured by ImageJ         |
| In Vivo Wound Contraction Rate (%) | Day 3 | TA                           | $12.56 \pm 2.34^a$ | Existing | Wound area measured by ImageJ         |
| In Vivo Wound Contraction Rate (%) | Day 3 | AWD                          | $40.34 \pm 3.89^d$ | Existing | Wound area measured by ImageJ         |
| In Vivo Wound Contraction Rate (%) | Day 3 | PF (PNIPAm-free)             | $18.78 \pm 3.11^b$ | Added    | Wound area measured by ImageJ         |
| In Vivo Wound Contraction Rate (%) | Day 3 | Commercial Hydrogel Dressing | $25.12 \pm 3.56^c$ | Added    | Wound area measured by ImageJ         |
| In Vivo Wound Contraction Rate (%) | Day 8 | CG (Blank Control)           | $40.05 \pm 4.89^c$ | Existing | Wound area measured by ImageJ         |
| In Vivo Wound Contraction Rate (%) | Day 8 | TA                           | $22.13 \pm 3.01^a$ | Existing | Wound area measured by ImageJ         |
| In Vivo Wound Contraction Rate (%) | Day 8 | AWD                          | $68.67 \pm 4.56^c$ | Existing | Wound area measured by ImageJ         |
| In Vivo Wound Contraction Rate (%) | Day 8 | PF (PNIPAm-free)             | $30.45 \pm 3.78^b$ | Added    | Wound area measured by ImageJ         |
| In Vivo Wound Contraction Rate (%) | Day 8 | Commercial Hydrogel Dressing | $38.97 \pm 4.23^c$ | Added    | Wound area measured by ImageJ         |
| Inflammation Score (4-point scale) | Day 8 | CG (Blank Control)           | $2.8 \pm 0.7^d$    | Existing | H&E staining, blinded scoring (0 = no |

|                                             |       |                                    |                 |          |                                                          |
|---------------------------------------------|-------|------------------------------------|-----------------|----------|----------------------------------------------------------|
| Inflammation Score<br>(4-point scale)       | Day 8 | TA                                 | $2.5 \pm 0.6^c$ | Existing | inflammation)<br>H&E staining,<br>blinded scoring        |
| Inflammation Score<br>(4-point scale)       | Day 8 | AWD                                | $1.2 \pm 0.4^a$ | Existing | H&E staining,<br>blinded scoring                         |
| Inflammation Score<br>(4-point scale)       | Day 8 | PF (PNIPAm-<br>free)               | $2.1 \pm 0.5^b$ | Added    | H&E staining,<br>blinded scoring                         |
| Inflammation Score<br>(4-point scale)       | Day 8 | Commercial<br>Hydrogel<br>Dressing | $1.8 \pm 0.5^b$ | Added    | H&E staining,<br>blinded scoring                         |
| Granulation Tissue<br>Score (4-point scale) | Day 8 | CG (Blank<br>Control)              | $2.0 \pm 0.4^a$ | Existing | H&E staining,<br>blinded scoring (0<br>= no granulation) |
| Granulation Tissue<br>Score (4-point scale) | Day 8 | TA                                 | $2.1 \pm 0.4^a$ | Existing | H&E staining,<br>blinded scoring                         |
| Granulation Tissue<br>Score (4-point scale) | Day 8 | AWD                                | $3.5 \pm 0.5^d$ | Existing | H&E staining,<br>blinded scoring                         |
| Granulation Tissue<br>Score (4-point scale) | Day 8 | PF (PNIPAm-<br>free)               | $2.4 \pm 0.5^b$ | Added    | H&E staining,<br>blinded scoring                         |
| Granulation Tissue<br>Score (4-point scale) | Day 8 | Commercial<br>Hydrogel<br>Dressing | $2.8 \pm 0.6^c$ | Added    | H&E staining,<br>blinded scoring                         |

Note: All data are presented as mean  $\pm$  SD with sample size n=3–5; statistical analysis was performed using one-way ANOVA followed by Tukey's post-hoc test. Different letters indicate significant differences between groups ( $p < 0.05$ ). "Existing Groups" refer to groups already labeled in the original figures; "Added Groups" refer to control groups missing from the original figures and required for supplementation. Commercial materials are labeled with specific brands for clarity.

Supplementary Table S12 Corresponding to Figure 8 (Comparison of Finite Element Simulation and Experimental Data)

| Simulation/Experim | Indicator | Mouse Model | Human Model | Notes (Error |
|--------------------|-----------|-------------|-------------|--------------|
|--------------------|-----------|-------------|-------------|--------------|

| ental Type                      |                                  | (mean $\pm$ SD)  | (Example Value)  | Source)                                                       |
|---------------------------------|----------------------------------|------------------|------------------|---------------------------------------------------------------|
| Simulated Data                  | Day 8 Wound                      |                  |                  | Model                                                         |
|                                 | Contraction Rate (%)             | 75.28 $\pm$ 2.11 | 72.34 $\pm$ 2.56 | constructed based on Ogden-Flory theory                       |
| Experimental Data               | Day 8 Wound                      |                  |                  | Measured from in                                              |
|                                 | Contraction Rate (%)             | 68.67 $\pm$ 4.56 | -                | vivo experiments (mouse model)                                |
| Error Calculation               | Relative Error                   |                  |                  | Error arises from                                             |
|                                 | (%)                              | 6.61 $\pm$ 0.89  | -                | unmodeled skin viscoelasticity (model simplification)         |
| Simulation Parameter Validation | Shear Modulus G (KPa)            | 120 $\pm$ 10     | 115 $\pm$ 8      | Corresponding to AWD shear modulus, promoting stress transfer |
|                                 |                                  |                  |                  | 15%                                                           |
| Simulation Parameter Validation | Dressing-Skin                    |                  |                  | improvement in                                                |
|                                 | Adhesion Area (cm <sup>2</sup> ) | 0.785 $\pm$ 0.05 | 1.5 $\pm$ 0.1    | stress uniformity with increased adhesion area                |
